# Supplementary material
Source: publisher figshare collection journal article supplement (https://karger.figshare.com/ndownloader/files/28959555)
Supplement: Supplementary file 1 [file 28959555]

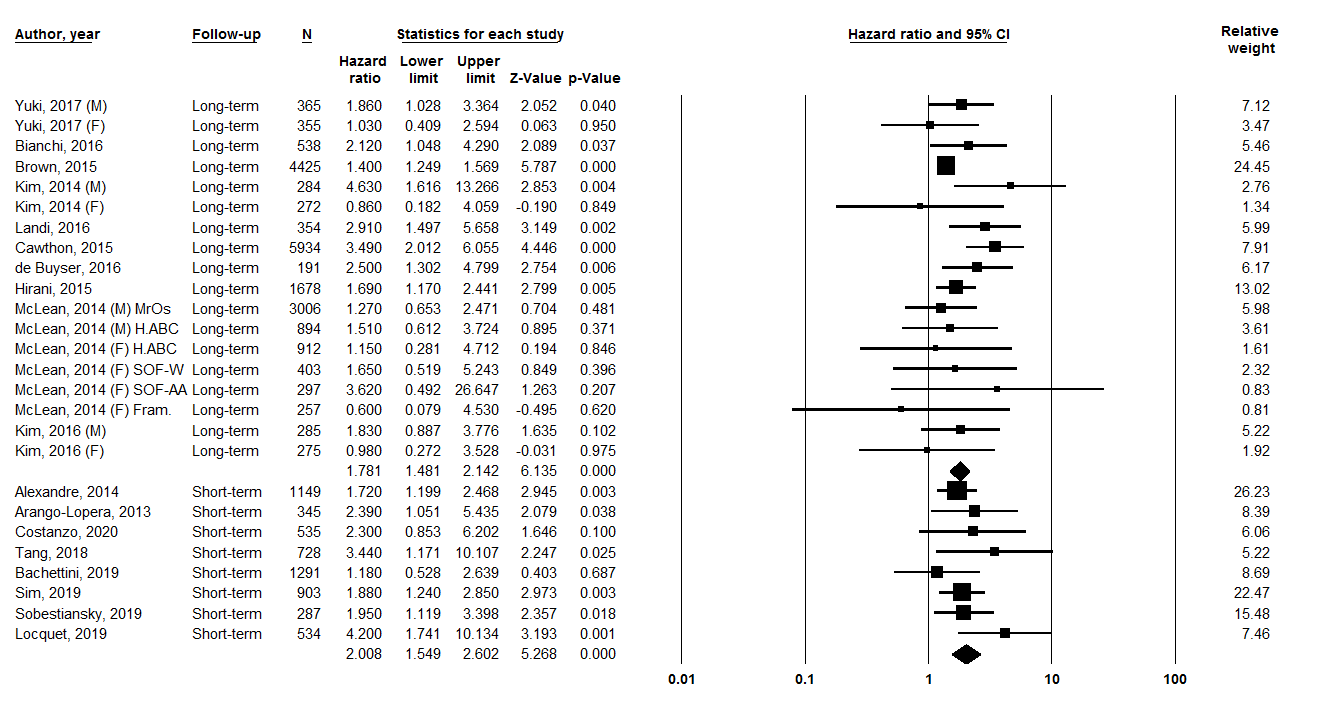
**Supplementary Figure 5.** Meta-analysis of the association between sarcopenia and mortality in community-dwelling adults presented in hazard ratios, stratified by long- and short-term follow-up

Heterogeneity (I2): long-term follow-up (35.7%), short-term follow-up (0%).
M: males, F: females, MrOs: Men Study Sleep Study Ancillary Study, H.ABC: Health Aging and Body Composition Study, SOF-W: Study of Osteoporotic Fractures Original, SOF-AA: Study of Osteoporotic Fractures African American cohorts, Fram.: Framingham Study Offspring cohort
